# Supplementary material for: Micro and macrorheology at fluid–fluid interfaces
Source: Royal Society of Chemistry journal article supplement (doi:10.1039/c4sm00646a), 2014-01-01
Supplement: c4sm00646a2.pdf [file c4sm00646a2.pdf]

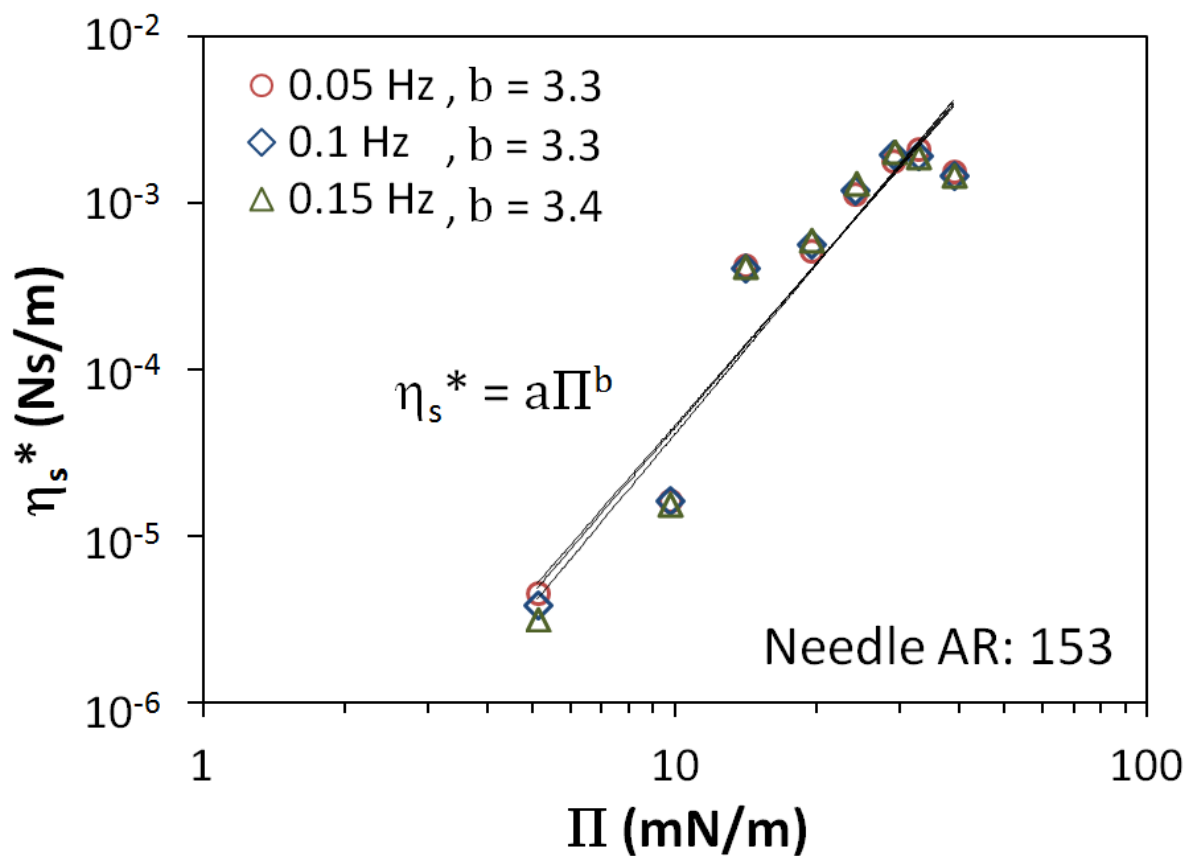

ISR-needle data was obtained in the low-frequency limit. The figure here shows how the data remains unchanged by increasing the measurement frequency from 0.05 Hz (the frequency used in our measurements) to 0.1 and 0.15 Hz. The same result is obtained for all needle aspect ratios.
